# Supplementary material
Source: Springer Nature journal article supplement (https://www.springermedizin.de/resource/supplementary/12887_2009_335_MOESM2_ESM.pdf/9474864)
Supplement: MOESM2 [file 9474864]

291 records identified from a search of the databases (241 from Pubmed)

No records identified from other sources

284 studies remained after removal of duplicates

24 reviews excluded

260 abstracts screened for consideration

240 records excluded

20 full text articles assessed for eligibility

10 full texts articles excluded

10 studies included in qualitative synthesis

No studies pooled for meta-analysis
